# Supplementary material for: The Importance of Endoplasmic Reticulum Stress as a Novel Antidepressant Drug Target and Its Potential Impact on CNS Disorders
Source: MDPI journal article supplement (doi:10.3390/pharmaceutics14040846), 2022-04-12
Supplement: s1 [file s1]

| Studied gene | a<br>TM          | b<br>Ami+TM      | c<br>Esci+TM     | d<br>R-ket+TM    | e<br>S-ket+TM    | f<br>$\Delta$ b-a | g<br>$\Delta$ c-a | h<br>$\Delta$ d-a | I<br>$\Delta$ e-a |
|--------------|------------------|------------------|------------------|------------------|------------------|-------------------|-------------------|-------------------|-------------------|
| ATF4         | 2.87 $\pm$ 0.28  | 3.19 $\pm$ 0.43  | 3.03 $\pm$ 0.35  | 3.28 $\pm$ 0.45  | 3.35 $\pm$ 0.32  |                   |                   |                   |                   |
| ATF6         | 2.50 $\pm$ 0.31  | 2.63 $\pm$ 0.30  | 2.52 $\pm$ 0.39  | 2.58 $\pm$ 0.30  | 2.30 $\pm$ 0.22  |                   |                   |                   |                   |
| CREB3        | 2.34 $\pm$ 0.23  | 1.59 $\pm$ 0.13  | 2.24 $\pm$ 0.29  | 2.23 $\pm$ 0.19  | 4.01 $\pm$ 1.27  |                   |                   |                   | ↑                 |
| CREB3L1      | 1.49 $\pm$ 0.13  | 1.47 $\pm$ 0.25  | 1.44 $\pm$ 0.31  | 2.99 $\pm$ 0.67  | 2.50 $\pm$ 0.45  |                   |                   | ↑ *               | ↑                 |
| CREB3L4      | 3.91 $\pm$ 0.99  | 3.64 $\pm$ 1.66  | 5.50 $\pm$ 2.89  | 3.09 $\pm$ 1.57  | 6.07 $\pm$ 1.32  |                   | ↑                 |                   | ↑                 |
| DDIT3        | 13.75 $\pm$ 1.08 | 16.58 $\pm$ 2.09 | 14.2 $\pm$ 1.25  | 18.31 $\pm$ 1.88 | 19.59 $\pm$ 1.09 | ↑↑                |                   | ↑↑ *              | ↑↑↑ **            |
| EDEM1        | 3.85 $\pm$ 0.35  | 4.08 $\pm$ 0.63  | 3.61 $\pm$ 0.63  | 5.08 $\pm$ 0.50  | 5.55 $\pm$ 0.56  |                   |                   | ↑                 | ↑                 |
| EIF2AK3      | 1.78 $\pm$ 0.17  | 2.04 $\pm$ 0.35  | 1.67 $\pm$ 0.34  | 1.95 $\pm$ 0.23  | 2.56 $\pm$ 0.67  |                   |                   |                   |                   |
| EIF2S1       | 0.99 $\pm$ 0.14  | 0.90 $\pm$ 0.16  | 0.74 $\pm$ 0.21  | 0.72 $\pm$ 0.13  | 0.70 $\pm$ 0.13  |                   |                   |                   |                   |
| ERN1         | 3.61 $\pm$ 0.37  | 3.36 $\pm$ 0.71  | 3.99 $\pm$ 1.03  | 6.37 $\pm$ 1.59  | 8.26 $\pm$ 2.10  |                   |                   | ↑↑                | ↑↑↑ *             |
| GABPA        | 1.14 $\pm$ 0.10  | 1.36 $\pm$ 0.07  | 1.00 $\pm$ 0.18  | 1.15 $\pm$ 0.18  | 1.28 $\pm$ 0.30  |                   |                   |                   |                   |
| HSPA5        | 19.36 $\pm$ 1.26 | 20.06 $\pm$ 3.62 | 19.09 $\pm$ 3.00 | 17.54 $\pm$ 2.25 | 20.07 $\pm$ 2.54 |                   |                   | ↓                 |                   |
| MAP3K4       | 1.35 $\pm$ 0.14  | 1.60 $\pm$ 0.27  | 1.29 $\pm$ 0.24  | 1.62 $\pm$ 0.44  | 1.56 $\pm$ 0.30  |                   |                   |                   |                   |

**Table S1.** Effect of tunicamycin (TM) with antidepressants (Ami- amitriptyline, Esci – escitalopram, R-ket - R-ketamine, and S-ket - S-ketamine) and tunicamycin alone in astrocytes with regard to the expression of genes associated with ER stress. To illustrate the difference ( $\Delta$ ) in gene expression of antidepressants the symbols were introduced: ↑ for 1-2.5 fold change; ↑↑ 2.6-4.5 fold change; ↑↑↑ > 4.6 fold change. Data are presented as mean  $\pm$  SEM and expressed as fold change vs untreated control cells. Statistical significance vs tunicamycin-treated cells is indicated when appropriate; \*\*  $p < 0.01$ ; \*  $p < 0.05$ .
